# Supplementary material for: Syntheses and luminescence of La1−xEux[B8O11(OH)5] and β-La1−xEuxB5O9 (0 ≤ x ≤ 0.135)
Source: Royal Society of Chemistry journal article supplement (doi:10.1039/c5nj02091c), 2015-01-01
Supplement: c5nj02091c1.pdf [file c5nj02091c1.pdf]

Electronic Supplementary Information for

Syntheses and luminescence of  $\text{La}_{1-x}\text{Eu}_x[\text{B}_8\text{O}_{11}(\text{OH})_5]$  and  
 $\beta\text{-La}_{1-x}\text{Eu}_x\text{B}_5\text{O}_9$  ( $0 \leq x \leq 0.135$ )

*Xiaorui Sun,<sup>a</sup> Wenliang Gao,<sup>a</sup> Rihong Cong,<sup>a\*</sup> Tao Yang<sup>a\*</sup>*

<sup>a</sup>College of Chemistry and Chemical Engineering, Chongqing University, Chongqing  
400044, P. R. China

\*Correspondence authors, email: [congrihong@cqu.edu.cn](mailto:congrihong@cqu.edu.cn), [taoyang@cqu.edu.cn](mailto:taoyang@cqu.edu.cn); Tel:  
+86-23-65105065.

Table S1 Unit cell parameters (in the space group  $P2_1/n$ ) of  $\text{La}_{1-x}\text{Eu}_x[\text{B}_8\text{O}_{11}(\text{OH})_5]$  ( $0.01 \leq x \leq 0.135$ ) obtained from Le Bail fitting of the whole powder XRD patterns.

| $x$ in<br>$\text{La}_{1-x}\text{Eu}_x[\text{B}_8\text{O}_{11}(\text{OH})_5]$ | $a$ (Å) | $b$ (Å) | $c$ (Å) | $\beta$ (°) | $V$ (Å <sup>3</sup> ) |
|------------------------------------------------------------------------------|---------|---------|---------|-------------|-----------------------|
| 0                                                                            | 9.923   | 14.325  | 8.040   | 89.90       | 1142.9                |
| 0.010                                                                        | 9.924   | 14.326  | 8.040   | 89.89       | 1143.0                |
| 0.025                                                                        | 9.914   | 14.322  | 8.028   | 89.77       | 1140.0                |
| 0.040                                                                        | 9.910   | 14.316  | 8.026   | 89.79       | 1138.7                |
| 0.055                                                                        | 9.909   | 14.310  | 8.012   | 89.90       | 1136.1                |
| 0.070                                                                        | 9.908   | 14.302  | 8.009   | 89.87       | 1134.9                |
| 0.085                                                                        | 9.905   | 14.282  | 8.004   | 89.82       | 1132.2                |
| 0.100                                                                        | 9.902   | 14.273  | 8.000   | 89.90       | 1130.7                |
| 0.135                                                                        | 9.895   | 14.246  | 7.986   | 89.86       | 1125.7                |

Table S2 Unit cell parameters (in the space group  $P2_1/c$ ) of  $\beta\text{-La}_{1-x}\text{Eu}_x\text{B}_5\text{O}_9$  ( $0.01 \leq x \leq 0.135$ ) obtained from Le Bail fitting of the whole powder XRD patterns.

| $x$ in<br>$\beta\text{-La}_{1-x}\text{Eu}_x\text{B}_5\text{O}_9$ | $a$ (Å) | $b$ (Å) | $c$ (Å) | $\beta$ (°) | $V$ (Å <sup>3</sup> ) |
|------------------------------------------------------------------|---------|---------|---------|-------------|-----------------------|
| 0.01                                                             | 6.445   | 11.695  | 8.177   | 105.18      | 594.8                 |
| 0.01                                                             | 6.444   | 11.693  | 8.175   | 105.17      | 594.6                 |
| 0.025                                                            | 6.443   | 11.689  | 8.173   | 105.18      | 594.0                 |
| 0.04                                                             | 6.441   | 11.684  | 8.170   | 105.19      | 593.3                 |
| 0.055                                                            | 6.440   | 11.682  | 8.170   | 105.20      | 593.1                 |
| 0.07                                                             | 6.439   | 11.680  | 8.168   | 105.20      | 592.9                 |
| 0.085                                                            | 6.438   | 11.677  | 8.166   | 105.20      | 592.5                 |
| 0.1                                                              | 6.437   | 11.675  | 8.165   | 105.21      | 592.1                 |
| 0.135                                                            | 6.435   | 11.670  | 8.162   | 105.21      | 591.4                 |

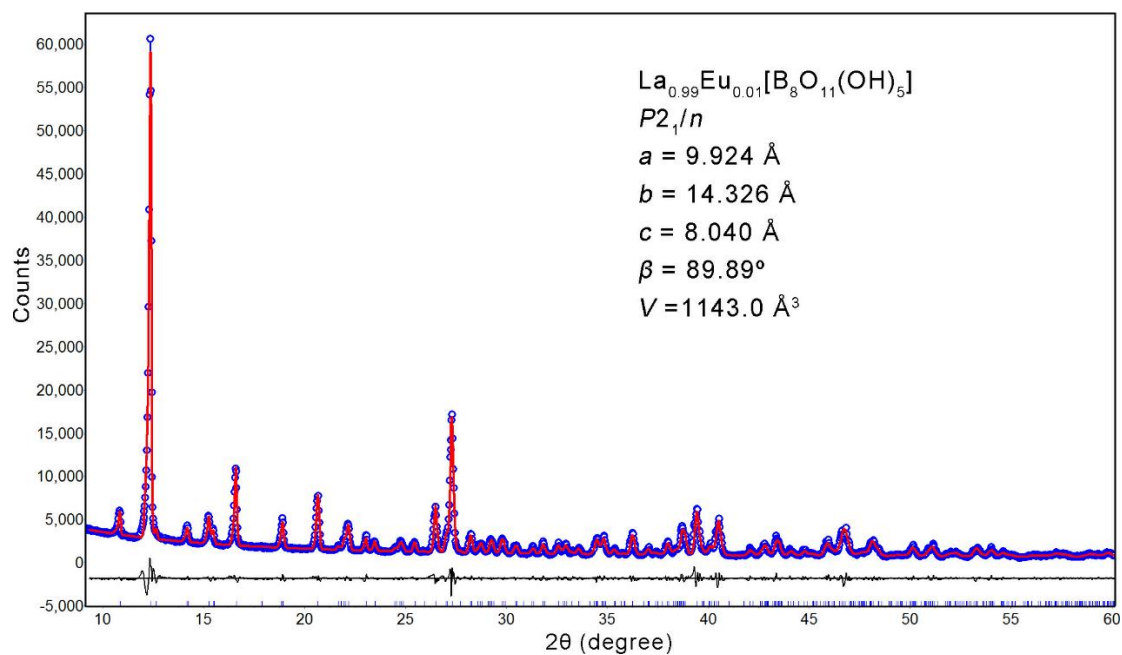

Fig. S1 A representative of Le Bail fitting for as-prepared  $\text{La}_{0.99}\text{Eu}_{0.01}[\text{B}_8\text{O}_{11}(\text{OH})_5]$ . The blue symbol  $\circ$  represents observed data and the red solid line is the calculated pattern; the blue marks below the diffraction patterns are the expected reflection positions, and the difference curve is also shown as black curves at the bottom.

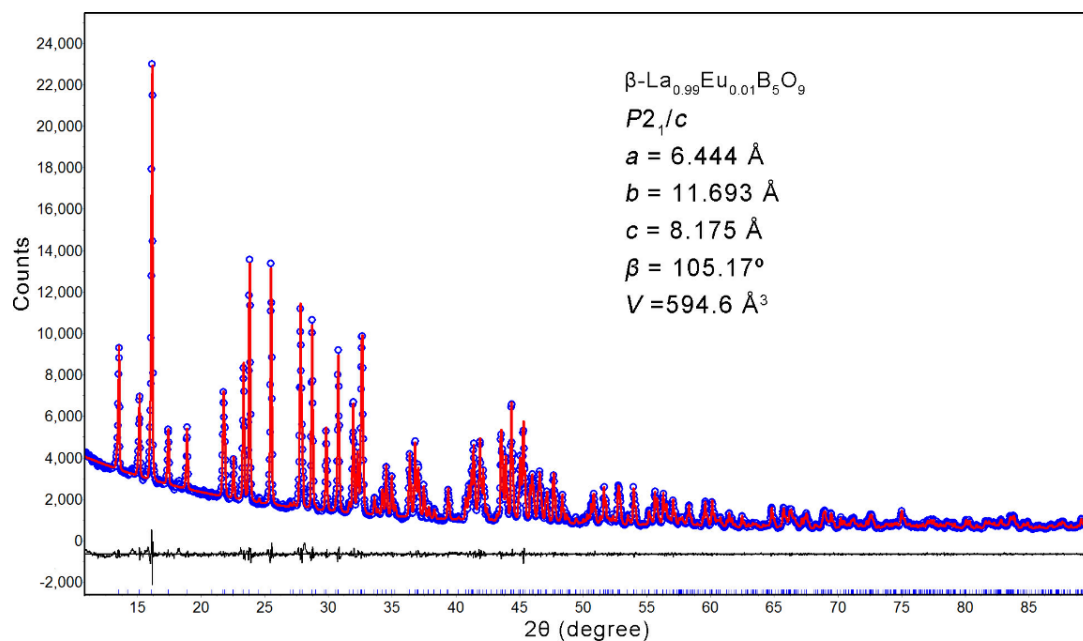

Fig. S2 A representative of Le Bail fitting for as-prepared  $\beta\text{-La}_{0.99}\text{Eu}_{0.01}\text{B}_5\text{O}_9$ .

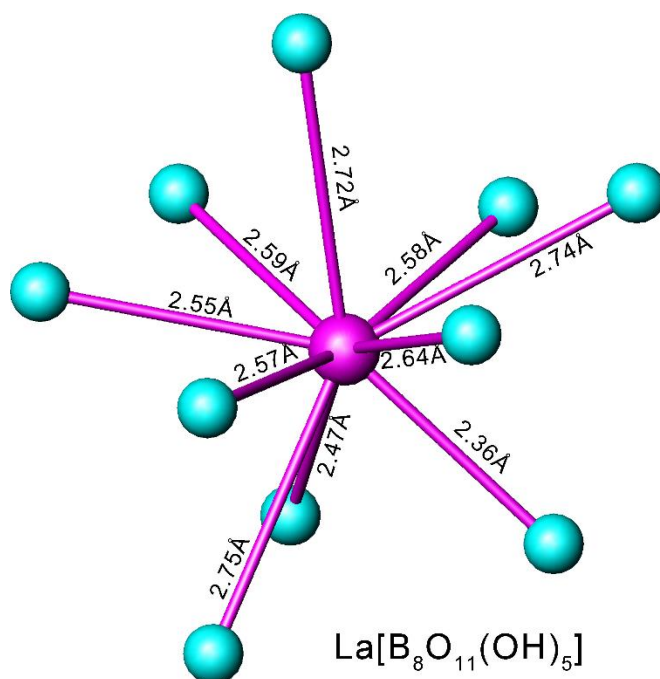

Fig. S3 The coordination environment of  $\text{La}^{3+}$  in  $\text{La}[\text{B}_8\text{O}_{11}(\text{OH})_5]$ , purple and cyan spheres represent La and O, respectively. Bond distances are all highlighted.

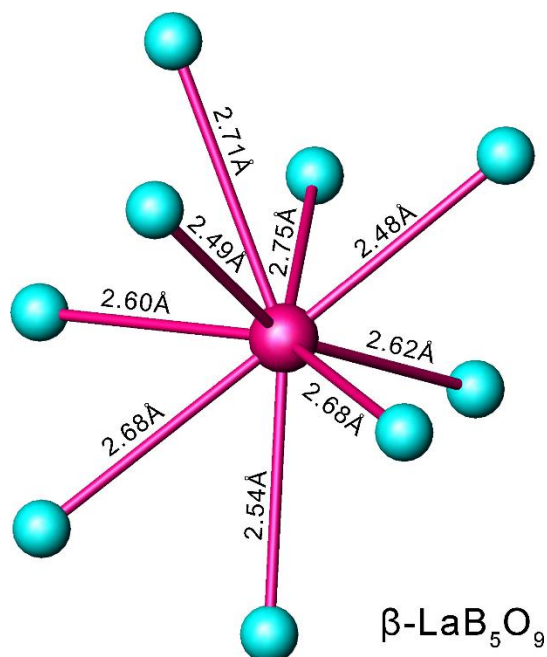

Fig. S4 The coordination environment of  $\text{La}^{3+}$  in  $\beta\text{-LaB}_5\text{O}_9$ . Red and cyan spheres represent La and O, respectively. Bond distances are all highlighted.
